# Supplementary material
Source: PubMed Central journal article supplement (PMC4125742)
Supplement: supp_M113.035782_mcp.M113.035782-1.pdf [file supp_M113.035782_mcp.M113.035782-1.pdf]

SUPPLEMENTAL TABLES

TABLE SI

Oligonucleotide primers used for generation of PCR products for BACmid recombination and siRNA sequences used for knockdown of pUL50 and pUL97 expression

<sup>a</sup>Nucleotide specification: additional bases (lower case letters), CODING SEQUENCE (capital letters), **RESTRICTION SITE** (capital letters, bold), **NUCLEOTIDES DIFFERING FROM WILD-TYPE SEQUENCE** (capital letters, bold, italic), [-Scel site] (white)

| Designation                | Size [bp] | Sequence                                                                                                                                                       |
|----------------------------|-----------|----------------------------------------------------------------------------------------------------------------------------------------------------------------|
| <b>Primers<sup>a</sup></b> |           |                                                                                                                                                                |
| UL50L11Afor                | 86        | tac <b>GGATCC</b> ACGCGCAGCTCGCTGGGACCCA <b>ACTT</b> GAGGATACGCCGC GTGGCCTGCAC <b>CGC</b> <i>TAGGGATAACAGGGTAAT</i> CGATTT                                     |
| UL50L11Arev                | 135       | tac <b>GAATTC</b> TCGGCGGTGGCGTTCGGTGCATGGAGATGAACAAGGTTCCATCAGGAT <b>GCGGT</b> GCAGGCCACGCGGCGTATCCTCAAGTTGGGT CCCAGCGAGCTGCGCGTGCCAGTGTTACAACCAATTAACC       |
| UL50Q13Afor                | 86        | tac <b>GGATCC</b> TCGGTGACGCGCAGCTCGCTGGGACCCA <b>ACTT</b> GAGGATA CGCCGCGTGGC <b>CGC</b> <i>TAGGGATAACAGGGTAAT</i> CGATTT                                     |
| UL50Q13Arev                | 135       | tac <b>GAATTC</b> CTGGCGTTCGGTGCATGGAGATGAACAAGGTTCTCCATC AGGATCTGGTG <b>GCGGCC</b> ACGCGGCGTATCCTCAAGTTGGGTCCCAGC GAGCTGCGCGTCACCGAGCCAGTGTTACAACCAATTAACC    |
| UL50E56Afor                | 86        | tac <b>GGATCC</b> ATAAAACAAGGCACGTGGTCTGTGCGGCTCTCCCAGTAG CTGAGTAGATA <b>CGC</b> <i>TAGGGATAACAGGGTAAT</i> CGATTT                                              |
| UL50E56Arev                | 135       | tac <b>GAATTC</b> ATTACTCGGTGTGCGACGCCATGCTCAAGACAGACACGGT CTATTGTGTC <b>GCGT</b> ATCTACTCAGCTACTGGGAGAGCCGCACAGACCA CGTGCCTTGTTTTATGCCAGTGTTACAACCAATTAACC    |
| E56AY57Afor UL50           | 89        | tac <b>GGATCC</b> AAGATAAAACAAGGCACGTGGTCTGTGCGGCTCTCCCAG TAGCTGAGTAG <b>CGCCGC</b> <i>TAGGGATAACAGGGTAAT</i> CGATTT                                           |
| E56AY57Arev UL50           | 138       | tac <b>GAATTC</b> ATTACTCGGTGTGCGACGCCATGCTCAAGACAGACACGGT CTATTGTGTC <b>GCGGCG</b> CTACTCAGCTACTGGGAGAGCCGCACAGACC ACGTGCCTTGTTTTATCTTGCCAGTGTTACAACCAATTAACC |
| UL50L116Afor               | 86        | tac <b>GGATCC</b> CACTTCGTCAGCACTCCGTAGGCCGAGGGCTTGATCTCC TCGATGTCCTT <b>CGC</b> <i>TAGGGATAACAGGGTAAT</i> CGATTT                                              |
| UL50L116Arev               | 135       | tac <b>GAATTC</b> CAGTAGGTGAGTTCAATGTGCTTAAGGTGAACGAGTTCGCT CATCGTCACG <b>GCGA</b> AGGACATCGAGGAGATCAAGCCCTCGGCCTACG GAGTGCTGACGAAGTGGCCAGTGTTACAACCAATTAACC   |
| <b>siRNAs</b>              |           |                                                                                                                                                                |
| UL50a                      | 21        | GACAGACACGGUCUAUUGUUU (sense sequence)<br>ACAAUAGACCGUGUCUGUCUU (antisense sequence)                                                                           |
| UL50b                      | 21        | UUCGGCGUCGGUGUUCAACUU (sense sequence)<br>GUUGAACACCGACGCCGAAUU (antisense sequence)                                                                           |
| UL50A                      | 21        | GACAGACACGGUCUAUUGUUU (sense sequence)<br>ACAAUAGACCGUGUCUGUCUU (antisense sequence)                                                                           |
| UL50B                      | 21        | UUCGGCGUCGGUGUUCAACUU (sense sequence)<br>GUUGAACACCGACGCCGAAUU (antisense sequence)                                                                           |
| UL50C                      | 21        | UAUCUGCUCAGCUACUGGGUU (sense sequence)<br>CCCAGUAGCUGAGCAGAUUU (antisense sequence)                                                                            |
| UL50D                      | 21        | UGUGCUUAAGGUGAACGAGUU (sense sequence)<br>CUCGUUCACCUUAAGCACAUU (antisense sequence)                                                                           |
| UL97a                      | 21        | UUUCUCAAUCACCAGUGUCUU (sense sequence)<br>GACACUGGUGAUUGAGAAUU (antisense sequence)                                                                            |
| UL97b                      | 21        | GAUCUGUUAUGCCGUGGACUU (sense sequence)<br>GUCCACGGCAUAACAGAUCUU (antisense sequence)                                                                           |

Table SII

List of NEC samples and corresponding negative control samples analyzed by MS/MS

| No. of Exp.   | Sample  | Virus               | IP antibody       | dpi | Specificity/<br>Negative Control |
|---------------|---------|---------------------|-------------------|-----|----------------------------------|
| I.<br>MS/MS   | NEC 1   | UL53-FLAG           | mAb-FLAG          | 7   | pUL53                            |
|               | NEC 2   | UL53-FLAG + UL50-HA | mAb-FLAG + mAb-HA | 7   | pUL53 + pUL50                    |
|               | Ctrl 1  | UL53-FLAG           | mAb-HA            | 7   | Control for NEC 1                |
|               | Ctrl 2  | UL53-FLAG + UL50-HA | mAb-GFP           | 7   | Control for NEC 2                |
| II.<br>MS/MS  | NEC 3   | UL53-FLAG           | mAb-FLAG          | >7  | pUL53                            |
|               | NEC 4   | UL50-HA             | mAb-FLAG + mAb-HA | >7  | pUL50                            |
|               | Ctrl 3a | HCMV-GFP            | mAb-FLAG          | >7  | Control for NEC 3                |
|               | Ctrl 3b | UL53-FLAG           | mAb-HA            | >7  | Control for NEC 3                |
|               | Ctrl 4  | UL50-HA             | mAb-GFP           | >7  | Control for NEC 4                |
| III.<br>MS/MS | NEC 5   | UL53-FLAG           | mAb-FLAG          | 1   | pUL53                            |
|               | NEC 6   | UL53-FLAG           | mAb-FLAG          | 2   | pUL53                            |
|               | NEC 7   | UL53-FLAG           | mAb-FLAG          | 3   | pUL53                            |
|               | NEC 8   | UL53-FLAG           | mAb-FLAG          | 4   | pUL53                            |
|               | Ctrl 5  | Mock                | mAb-FLAG          | 1   | Control for NEC 5                |
|               | Ctrl 6  | Mock                | mAb-FLAG          | 2   | Control for NEC 6                |
|               | Ctrl 7  | Mock                | mAb-FLAG          | 3   | Control for NEC 7                |
|               | Ctrl 8  | Mock                | mAb-FLAG          | 4   | Control for NEC 8                |
| IV.<br>MS/MS  | NEC 9   | UL53-FLAG           | mAb-FLAG          | 2   | pUL53                            |
|               | NEC 10  | UL53-FLAG           | mAb-FLAG          | 3   | pUL53                            |
|               | NEC 11  | UL53-FLAG           | mAb-FLAG          | 4   | pUL53                            |
|               | Ctrl 9a | Mock                | mAb-FLAG          | 2   | Control for NEC 9                |
|               | Ctrl 9b | UL53-FLAG           | Fab fragment      | 2   | Control for NEC 9                |
|               | Ctrl 10 | UL53-FLAG           | Fab fragment      | 3   | Control for NEC 10               |
|               | Ctrl 11 | UL53-FLAG           | Fab fragment      | 4   | Control for NEC 11               |

SUPPLEMENTAL FIGURES

Figure S1

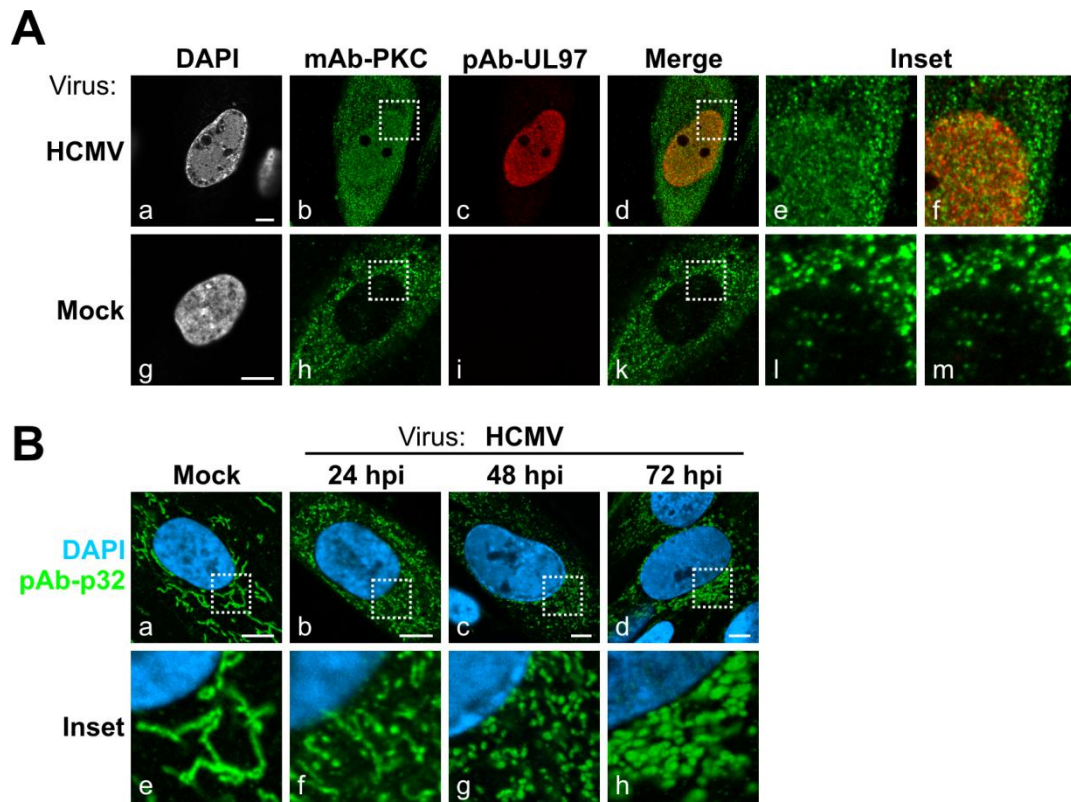

FIG. S1. Intracellular localization of NEC-associated viral protein kinase pUL97, cellular PKC, and cellular protein p32/gC1qR in HCMV-infected primary fibroblasts. HFFs were infected with HCMV strain AD169 (A, panels a-f and B) or remained uninfected (mock) (A, panels g-m). At 3 dpi (A) or at consecutive time-points post-infection (B), cells were fixed and coimmunostained with the indicated antibodies. B, Dashed boxes (panels a-d) are depicted in the insets (panels e-h). DAPI, 4',6-diamidino-2-phenylindole; scale bars, 7.5  $\mu$ m.

Figure SII

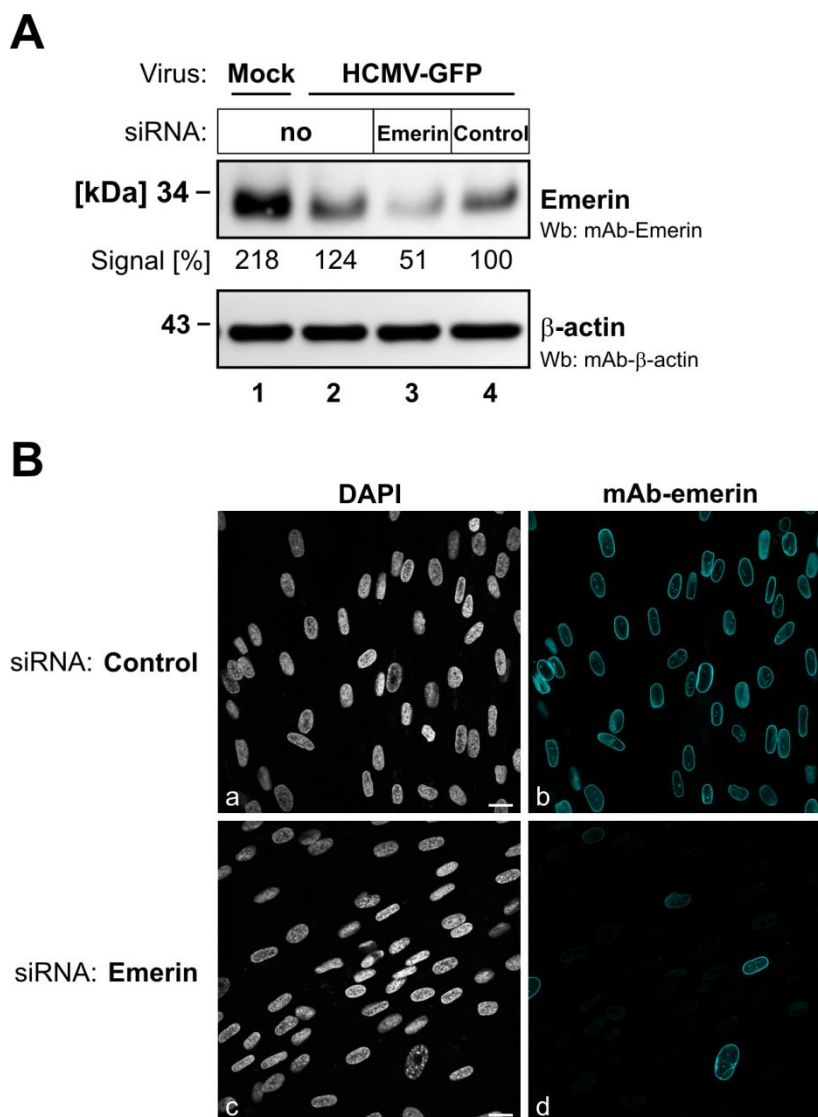

**FIG. S2. Knock-down efficiency of emerlin-specific siRNAs in primary fibroblasts.** HFFs were transiently transfected with emerlin-specific siRNAs or with a scrambled siRNA as a control. In addition, transfected cells were infected with the reporter virus HCMV-GFP (A, lanes 2-3) or remained uninfected (mock) (A, lane 1 and B). A, At 7 dpi, cells were harvested and HCMV replication efficiency was determined from total lysates by automated GFP fluorometry (see Fig. 6A). Thereafter, these samples were further subjected to Wb analysis to monitor the knock-down of emerlin. Signal intensities of emerlin expression were evaluated by densitometry and compared to the corresponding staining of the loading control  $\beta$ -actin. B, At 6 d post-transfection of siRNAs, cells were fixed and immunostained with mAb-emerin. Samples were subsequently analyzed by confocal laser scanning microscopy. Knock-down efficiency of emerlin-specific siRNAs was determined by scoring six microscopic fields (415 cells). In  $\sim$ 80% of the scored cells, endogenous emerlin levels were markedly reduced. *DAPI*, 4',6-di-amidino-2-phenylindole; *scale bars*, 20  $\mu$ m.
